1 **Inhibitory signaling in mammalian olfactory transduction potentially mediated by**

2 **Gα<sub>o</sub>**

3

4 Elizabeth A. Corey<sup>1</sup>, Kirill Ukhanov<sup>2</sup>, Yuriy V. Bobkov<sup>3</sup>, Jeremy C. McIntyre<sup>4</sup>, Jeffrey R.

5 Martens<sup>5</sup>, Barry W. Ache<sup>6</sup>

6

7 <sup>1</sup>Whitney Laboratory, and Center for Smell and Taste, University of Florida, Gainesville

8 FL 32610

9 <sup>2</sup>Dept. of Pharmacology and Therapeutics, and Center for Smell and Taste, University

10 of Florida, Gainesville FL 32610

11 <sup>3</sup>Whitney Laboratory, and Center for Smell and Taste, University of Florida, Gainesville

12 FL 32610

13 <sup>4</sup>Dept. of Neuroscience, and Center for Smell and Taste, University of Florida,

14 Gainesville FL 32610

15 <sup>5</sup>Dept. of Pharmacology and Therapeutics, and Center for Smell and Taste, University

16 of Florida, Gainesville FL 32610

17 <sup>6</sup>Whitney Laboratory, Depts. of Biology and Neuroscience, and Center for Smell and

18 Taste, University of Florida, Gainesville FL 32610

19

20 **Corresponding Author**

21 Barry W. Ache: [bwa@whitney.ufl.edu](mailto:bwa@whitney.ufl.edu)

22

23

## 24 **Abstract**

25           Olfactory GPCRs (ORs) in mammalian olfactory receptor neurons (ORNs)  
26 mediate excitation through the  $G\alpha_s$  family member  $G\alpha_{olf}$ . Here we tentatively associate  
27 a second G protein,  $G\alpha_o$ , with inhibitory signalling in mammalian olfactory transduction  
28 by first showing that odor evoked phosphoinositide 3-kinase (PI3K)-dependent inhibition  
29 of signal transduction is absent in the native ORNs of mice carrying a conditional OMP-  
30 Cre based knockout of  $G\alpha_o$ . We then identify an OR from native rat ORNs that are  
31 activated by octanol through cyclic nucleotide signaling and inhibited by citral in a PI3K-  
32 dependent manner. We show that the OR activates cyclic nucleotide signaling and PI3K  
33 signaling in a manner that reflects its functionality in native ORNs. Our findings lay the  
34 groundwork to explore the interesting possibility that ORs can interact with two different  
35 G proteins in a functionally identified, ligand-dependent manner to mediate opponent  
36 signaling in mature mammalian ORNs.

37

## 38 **Keywords**

39 Olfaction, olfactory receptor neurons, inhibition, modulation, combinatorial coding

40 .

## 41 **Introduction**

42           ORs comprise the largest family of mammalian GPCRs (Buck and Axel, 1991).  
43 Ligand (odorant) binding to ORs results in the cyclic nucleotide-dependent excitation of  
44 ORNs through  $G\alpha_{olf}$ , a member of the  $G\alpha_s$  subfamily (e.g., Belluscio et al., 1998). It has  
45 been known for some time that olfactory perception shows ‘mixture suppression’ and  
46 ‘mixture synergism’, in which one odorant either reduces or enhances, respectively, the

47 percept of another (e.g., Cain, 1974; Laing et al., 1984), and that at least some of this  
48 perceptual modulation can be assigned to the olfactory periphery (e.g., Bell et al., 1987;  
49 Laing and Wilcox, 1987). Receptor-driven modulation has since been studied directly  
50 (see following paragraph) and was recently shown to be widespread across ORs,  
51 indicating that it makes a fundamental contribution to the peripheral olfactory code (Xu  
52 et al., 2019). Thus, it is important to understand the processes that modulate cyclic  
53 nucleotide-dependent excitation in the dynamic range of activation.

54 Receptor-driven ‘mixture suppression’, also referred to as inhibition, antagonism,  
55 or masking, has received the most attention. Pharmacological, physiological, and  
56 computational evidence ascribe odor-evoked inhibition to competitive antagonism (e.g.,  
57 Firestein and Shepherd, 1992; Kurahashi et al., 1994; Oka et al., 2004). The implication  
58 is that ‘mixture suppression’ results from a reduction in cyclic nucleotide-dependent  
59 excitation due to odorants competing for a common binding site on the OR. Both  
60 physiological (Rospars et al, 2008) and computational (Reddy et al., 2017) evidence  
61 ascribe odorant-evoked inhibition to non-competitive antagonism in addition to  
62 competitive antagonism. Multiple non-competitive processes can result in odorant-  
63 evoked inhibition. Some, such as ‘odor masking’ involving the non-specific action of the  
64 antagonist on the cyclic nucleotide gated (CNG) output channel (e.g., Takeuchi et al.,  
65 2009), cannot account for the broad ligand specificity of odor-evoked inhibition seen  
66 across ORNs (Xu et al., 2019). A non-competitive process linked to odorant-evoked  
67 inhibition that is consistent with the ligand specificity seen across ORNs involves  
68 phosphoinositide 3-kinase (PI3K)-dependent signaling (Spehr et al., 2002; Ukhonov et  
69 al., 2010, 2011, 2013; Yu et al., 2014). Interestingly, the primary product of PI3K-

70 dependent signaling *in vivo*, PtdIns (3,4,5)P3 (PIP3), competitively competes with  
71 cAMP-dependent activation of the CNG channel (Zhainazarov et al., 2004; Brady et al.,  
72 2006), potentially confounding a simple mechanistic understanding of receptor-driven  
73 'mixture suppression'. Pharmacological evidence that PI3K-dependent, odorant-  
74 evoked inhibition is mediated by a G $\beta\gamma$  subunit implicates a G protein complex in this  
75 process (Ukhanov et al., 2011), as does earlier evidence that in heterologous systems  
76 at least, the function of an odorant (agonist, antagonist) depends on the G protein used  
77 (Shirokova et al., 2005).

78         Implicating a G $\beta\gamma$  subunit in PI3K-dependent, odorant-evoked inhibition raises  
79 the question of the associated G $\alpha$  protein. While G $\alpha_{\text{olf}}$ , the most abundant G $\alpha$  isoform  
80 expressed in the cilia of mammalian ORNs, could mediate activation of PI3K signaling  
81 through the release of G $\beta\gamma$ , other isoforms occur in cilia-enriched membrane  
82 preparations from the olfactory epithelium (OE) (e.g., Schandar et al., 1998; Wekesa  
83 and Anholt, 1999; Mayer et al., 2009). These other G proteins may function in  
84 processes as diverse as adaptation and cell survival (Watt et al., 2004; Mashukova et  
85 al., 2006; Kim et al., 2015a,b), but have also been implicated in signal transduction  
86 (e.g., Scholz et al., 2016b). If two different G protein complexes are involved in  
87 olfactory signal transduction, it is important to understand whether both are activated by  
88 the same OR.

89         Here, we provide evidence potentially linking PI3K-mediated inhibitory signaling  
90 pathway to G $\alpha_{\text{o}}$ . We demonstrate that odor-evoked PI3K-dependent inhibitory signaling  
91 is no longer detectable in mice carrying an OMP-Cre conditional deletion of G $\alpha_{\text{o}}$ . We  
92 show that fluorescently-tagged G $\alpha_{\text{o}}$  is trafficked to the cilia of native ORNs using viral-

93 mediated ectopic expression, and that  $G\alpha_o$  expression is reduced in the ORNs of mice  
94 carrying the OMP-Cre conditional deletion of  $G\alpha_o$  using IHC. We then use single cell  
95 RT-PCR to identify an OR expressed by mammalian ORNs that were activated by  
96 octanol and inhibited by citral in a PI3K-dependent manner. The functionality of the  
97 identified OR (Olr1845) persists in a HEK293T-based pCRE-SEAP assay. Using the  
98 same expression system we then implicated  $G\alpha_o$  in odor-dependent activation of PI3K  
99 by that OR using an ELISA. Collectively, our results are consistent with, although do  
100 not prove, that mammalian ORs can interact with at least two different G proteins in a  
101 functionally identified, ligand-dependent manner.

102

## 103 **Methods**

### 104 ***Animals***

105 Experiments were performed on adult female Sprague-Dawley rats, adult CD1  
106 mice, adult M71-SR1-IRES-tauGFP mice, as well as adult C57BL/6 and  $cGnao^{-/-}$  mice.  
107 All animal procedures were performed in accordance with the University of Florida  
108 animal care committee's regulations. Animals were euthanized by inhalation of carbon  
109 dioxide and decapitated immediately prior to dissection. All experiments were performed  
110 at room temperature (22–25°C) unless otherwise noted.  $cGnao^{-/-}$  animal breeding,  
111 genotyping, and genomic DNA analyses were performed using published protocols and  
112 primers (Chamero et al., 2011; Choi et al., 2014).

113

### 114 ***In situ hybridization and immunolabeling of cryosections***

115 Tissue fixation and cryo-sectioning were performed using published protocols.  
116 Briefly, the OE was fixed in 4% paraformaldehyde and then the tissue soaked in 30%  
117 sucrose at 4°C before embedding in optimal cutting temperature medium. 12 µM  
118 sections were collected under RNase-free conditions and stored at -80°C until use. *In*  
119 *situ* hybridization was performed using a modification of published methods (Ishii et al.,  
120 2004; Choi et al., 2016a). Briefly, tissue sections were hybridized with digoxigenin-  
121 labeled riboprobes for *Gnao* and *OMP* detection. After washing to remove unbound  
122 probe, the sections were then incubated with anti-digoigenin-HRP antibody (Roche) and  
123 labeling was detected with NBT/BCIP (Sigma). The sections were cover-slipped with  
124 Fluormount with DAPI (Southern Biotechnology) and visualized with a 10x and an oil  
125 immersion 60x lens on an Olympus BX41 microscope.

126 Immunostaining was performed using modifications of published protocols (e.g.,  
127 Choi et al., 2016). Briefly, antigen retrieval was performed by incubating the slides with  
128 10 mM sodium citrate buffer (pH 6.0) at 60°C for 30 min. After blocking with 10%  
129 (vol/vol) normal goat serum, 1% BSA, and 0.1% Triton X-100, sections were incubated  
130 with primary antibodies overnight at 4°C. The antibodies included Gα<sub>o</sub> (rabbit, 1:200;  
131 Santa Cruz Biotechnology) and OMP (goat, 1:500; Wako). The slides were washed  
132 with PBS containing 0.1% Triton X-100 and then with secondary antibodies conjugated  
133 with Alexa Fluor 488 (Invitrogen). Slides were coverslipped with Fluoromount DAPI  
134 (Southern Biotech) and labeling was visualized with 10x and oil immersion 60x lenses.

135

136 ***Calcium imaging***

137           Acutely dissociated rat or mouse ORNs were imaged using standard published  
138 approaches. Briefly, olfactory epithelia were dissected in ice-cold modified artificial  
139 cerebrospinal fluid (ACSF) saturated with 95% O<sub>2</sub> and 5% CO<sub>2</sub> that contained (in mM):  
140 120 NaCl, 25 NaHCO<sub>3</sub>, 5 KCl, 1.25 Na<sub>2</sub>HPO<sub>4</sub>, 1 MgSO<sub>4</sub>, 1 CaCl<sub>2</sub>, 10 glucose. The  
141 tissue was transferred in low-Ca<sup>2+</sup> (0.6 μM free Ca<sup>2+</sup> buffered with 5 mM EGTA) ACSF  
142 supplemented with 0.5 mg/ml papain (Sigma-Aldrich) and, in some cases, 10 units/ml  
143 TurboDNAse (Promega). After incubation for 20 min at 37°C in 5% CO<sub>2</sub>, the tissue was  
144 gently washed with normal oxygenated ACSF several times, minced with a razor blade  
145 and triturated with a large bore fire polished glass pipette. The resulting suspension was  
146 filtered through a 40 μm cell strainer (BD BioSciences). An aliquot of the suspension  
147 was mixed with 10 μM Fluo-3 or Fluo-4 containing 0.04% Pluronic F127 and placed on  
148 a glass coverslip coated with concanavalin A (Sigma-Aldrich) in a recording chamber  
149 (RC22, Warner Instruments). The volume of the chamber was 200 μL, allowing for  
150 complete exchange of the solution during application of odorant and/or inhibitors. In  
151 some experiments cells were placed and imaged in 35mm tissue culture dishes with  
152 cover glass bottom (FluoroDish, WPI) treated with concanavalin A. Odors were applied  
153 using a multi-channel rapid solution changer (RSC-160, Bio-Logic). The cells were  
154 illuminated at 500 nm and the emitted light was collected at 530 nm by a 12-bit cooled  
155 CCD camera (ORCA-R2, Hamamatsu). Both the illumination and image acquisition  
156 were controlled by Imaging Workbench 6.0 software (INDEC BioSystems). Each cell  
157 was assigned a region of interest (ROI) and changes in fluorescence intensity within  
158 each ROI were analyzed. Continuous traces of multiple responses were compensated  
159 for slow drift of the baseline fluorescence when necessary. All recordings were

160 performed at room temperature (22-25°C). Single odorants were of highest purity  
161 obtained from Sigma-Aldrich and were prepared fresh as used from 0.5M DMSO stocks  
162 kept at -20°C. The complex odorant Henkel-100 was dissolved 1:1 in anhydrous  
163 DMSO as a working stock solution.

164

### 165 ***Viral expression of fluorescently tagged $G\alpha_o$***

166 GFP and mCherry were inserted into the coding sequence of mouse  $G\alpha_o$  using  
167 site directed mutagenesis to create EcoRI cut sites within the  $G\alpha_o$  coding sequence  
168 followed by restriction enzyme digestion and T4 ligation. GFP and mCherry were  
169 amplified by PCR with primers designed to allow in frame insertion as previously  
170 described (Hynes et al., 2004). All constructs were fully sequenced prior to use.  
171  $G\alpha_o$ :GFP adenovirus (AdV) and  $G\alpha_o$ :mCherry adeno-associated virus (AAV2/5) were  
172 produced using previously described methods (e.g., Zolotukhin et al., 2002; McIntyre et  
173 al., 2015). For expression using AV in native tissue, recombinant GFP-fused cDNA was  
174 cloned into the vector p-ENTR by TOPO cloning methods. The inserts were then  
175 recombined into the adenoviral vector pAD/V5/-dest using LR Recombinase II (Life  
176 Technologies, Carlsbad CA). Viral plasmids were digested with PacI and transfected  
177 into HEK293 cells. Following an initial amplification, a crude viral lysate was produced,  
178 and used to infect confluent 60-mm dishes of HEK293 cells for amplification according  
179 to the ViraPower protocol (Life Technologies). AdV was isolated with the Virapur  
180 Adenovirus mini purification Virakit (Virapur, San Diego, CA), dialyzed in 2.5% glycerol,  
181 25 mM NaCl and 20 mM Tris-HCl, pH 8.0, and stored at -80°C until use. For ectopic  
182 expression in native tissue using AAV, the  $G\alpha_o$ :mCherry fusion was cloned into the



183 pTR-UF50-BC plasmid vector and virus was propagated in HEK293 cells using the  
184 pXYZ5 helper plasmid. For viral transduction of ORNs, mice were anesthetized with a  
185 Ketamine/Xylazine mixture and 10-15  $\mu$ L of purified viral solution was delivered  
186 intranasally as a single injection per nostril. Animals were used for experiments at 10  
187 days post-infection. The entire turbinate and septum were dissected and kept on ice in a  
188 petri dish filled with oxygenated ACSF. For imaging a small piece of the OE was  
189 mounted on the stage of the microscope in a perfusion chamber with the apical surface  
190 facing down. High resolution *en face* imaging of freshly dissected OE was performed on  
191 an inverted confocal microscope Leica SP5. Images were processed using ImageJ (NIH  
192 <http://imagej.nih.gov/ij/>) and assembled in CorelDraw13 (Corel).

193

#### 194 ***Single Cell RT-PCR***

195 Rat ORNs functionally characterized by calcium imaging were collected with a  
196 sterile glass micropipette directly into RT buffer for lysis. Cells were immediately frozen  
197 at stored at  $-80^{\circ}\text{C}$ . Single cell RT-PCR was performed using a modified approach based  
198 on previously described methodology (Touhara et al., 1999). Briefly RT was performed  
199 using a Verso RT kit (Thermo Fisher) with an anchored oligo dT primer for 60 minutes  
200 at  $42^{\circ}\text{C}$ . RT was followed by PCR detection of OMP and beta actin to exclude cells that  
201 were not ORNs and samples contaminated with genomic DNA. PCR with degenerate  
202 primers designed to amplify OR genes was performed as follows. The first round of  
203 amplification of OR genes was performed in a solution containing  $0.4\ \mu\text{M}$  each of the  
204 published degenerate primer and an adapter primer targeting the oligo d(T)18-anchor  
205 used for the RT,  $0.2\ \text{mM}$  dNTP, and PrimeSTAR HS Taq (Clontech) and the second

206 amplification used a nested set of primers targeting ORs. Each PCR consisted of 5 min  
207 at 95°C followed by 40 cycles at 95°C for 1 min, an annealing temperature dependent  
208 on primers for 3 min, and 72°C for 2 min. The PCR products were subsequently cloned  
209 into pGEM-T Easy (Promega) followed by sequencing (McLab) of multiple clones for  
210 each PCR product.

211

### 212 ***OR expression constructs***

213 Rat ORs identified by single cell RT-PCR were amplified from genomic rat DNA  
214 and mOR261-1 was amplified from genomic mouse DNA. The ORs were cloned into a  
215 pME18S-based Lucy-Rho vector (denoted here as pLucy-Rho-OR) (Shepard et al.,  
216 2013) for mammalian expression. All constructs were sequenced prior to use.

217

### 218 ***Culture and transfection of HEK293T cells***

219 HEK293T cells (ATCC) were grown in Dulbecco's modified Eagle medium  
220 (DMEM) supplemented with 10% fetal bovine serum, penicillin (100 U/ml), and  
221 streptomycin (100 mg/ml) in 5% CO<sub>2</sub> at 37°C. Before transfection, the cells were  
222 seeded into 35 mm tissue culture treated dishes and incubated for 24 hours. For pCRE-  
223 SEAP and PI3K assays, cells were transfected at 70% confluency using X-treme-GENE  
224 HP (Roche) at a ratio of 3:1 with plasmid DNA following the manufacturer's instructions.

225

### 226 ***pCRE-SEAP assay***

227 cAMP production was measured as previously described (Durocher et al., 2000).  
228 HEK293T cells were transfected with the expression vectors pcDNA3.1 Ric-8b (50 ng;

229 generously provided by Dr. Bettina Malnic, Universidade de São Paulo, Brazil),  
230 pcDNA3.1(+) Gaolf (50 ng; Missouri S&T cDNA Resource Center), pcDNA3.1(+) RTP1s  
231 (100 ng; subcloned from construct purchased from Thermo Fisher) and pLucy-Rho-OR  
232 (1.5 µg). For control experiments cells were transfected as above, however, the pLucy-  
233 Rho-OR construct was omitted. Cells were also transfected with 1.5 µg of a pCRE-  
234 SEAP, where the expression of the secreted alkaline phosphatase (SEAP) is under  
235 regulation of the cAMP responsive elements, (pCRE-SEAP) or a pTAL-SEAP, where  
236 the cAMP responsive elements are not present (Clontech; Durocher et al., 2000). Cells  
237 were also transfected with 50 ng pcDNA5/TO/LACZ (Invitrogen) to assess transfection  
238 efficiency. At 24 hr post-transfection the cells were re-seeded for SEAP analysis and  
239 odorants were added at the indicated dilutions at 48 hours post-transfection. Cells and  
240 supernatants were collected 20 hr later and centrifuged for 5 min at 5000 g. The  
241 supernatants were incubated for 30 min at 65°C and then frozen until analysis. SEAP  
242 activity was measured by mixing 100 µl of supernatant with an equal amount of  
243 BluePhos substrate (KPL). Samples were monitored for color development at 630 nm in  
244 a microwell plate reader. Mean SEAP activity was determined after subtracting the  
245 response of cells that were not expressing an OR and is reported in OD630 arbitrary  
246 units +/- SEM. Each experiment was repeated in triplicate with three replicates each.  
247 The data were analyzed using GraphPad Prism.

248

#### 249 ***PI3K assay***

250 HEK293T cells were transfected with 1.5 µg of pME18s Lucy-Rho-OR, 100 ng of  
251 pcDNA3.1(+) RTP1s and 100 ng of the indicated G protein construct, as well as with 0.5

252  $\mu$ g of pBTK-PH-YFP (generous gift from Dr. Tamas Balla; (Balla et al., 2009).  
253 pcDNA3.1(+)-based constructs for  $G\alpha_o$ ,  $G\alpha_{olf}$ , and  $G\alpha_{oG203T}$  were obtained from the  
254 Missouri S&T cDNA Resource Center. At 24 hours post-transfection, cells were split into  
255 35 mm dishes for analysis. After 24 hours, cells were incubated for 1 hour in 0.5% fetal  
256 bovine serum in DMEM including phosphatase inhibitors (Boston Bioproducts). For  
257 PI3K activation, cells were treated with odorant or DMSO (odorant carrier) for 30 sec  
258 and then immediately lysed with ice cold 5% TCA. Cells were scraped from dishes and  
259 the lysates were stored immediately at  $-80^{\circ}\text{C}$  until analysis. For analysis, lipids were  
260 extracted following a chloroform:methanol protocol and used immediately in a PIP3  
261 ELISA following the manufacturer's instructions (Echelon Biosciences). Each  
262 experiment was performed in triplicate. Mean PIP3 production was determined by  
263 subtracting the response to DMSO and is presented as  $\Delta\text{PIP3}$  (pM). The data were  
264 analyzed using GraphPad Prism.

265

## 266 **Results**

### 267 **$G\alpha_o$ is required for PI3K-dependent inhibitory signal transduction in mouse ORNs**

268 Given varied lines of evidence that  $G\alpha_o$  is expressed in mammalian ORNs  
269 (Mayer et al., 2009; Keydar et al., 2013; Heron et al., 2013; Nickell et al., 2012; Omura  
270 and Mombaerts, 2014; Saraiva et al., 2015; Scholz et al., 2016a, Choi et al., 2016; Wang  
271 et al., 2017; Zhang et al., 2016) and that  $G\alpha_o$  can physically interact with mammalian  
272 ORs (Scholz et al., 2016b), we looked for functional evidence to implicate  $G\alpha_o$  in PI3K-  
273 dependent inhibitory signal transduction in mature mouse ORNs. Mice carrying a global  
274 deletion of the *Gnao* gene display a variety of defects that include behavioral issues and

275 motor control deficiencies likely resulting from impaired neurogenesis and olfactory  
276 system development (Jiang et al., 1998; Choi et al., 2016). Therefore, to test the impact  
277 of deletion of *Gnao1* on olfactory signal transduction without possible confounds  
278 resulting from widespread issues with olfactory system development, we used a  
279 conditional Cre-based knockout (KO) model in which inactivation of *Gnao1* through  
280 deletion of exons 5 and 6 is restricted to OMP-positive cells, referred to as *cGnao1*<sup>-/-</sup>  
281 mice (Chamero et al., 2011; Oboti et al., 2014). Given that OMP expression is  
282 restricted to mature ORNs, the OE should develop normally and the impact of *Gao*  
283 deletion on signaling should be restricted to these cells.

284 We asked whether depletion of the  $G\alpha_o$  protein altered the odor-evoked activity  
285 of ORNs by monitoring the responses of acutely dissociated ORNs from C57Bl6J and  
286 *cGnao1*<sup>-/-</sup> mice to a complex odor mixture (H100) in the presence and absence of the  
287 PI3K blocker LY294002 (10  $\mu$ M) (Fig 1A, 1<sup>st</sup> and 2<sup>nd</sup> columns, showing type results for  
288 24 ORNs). We predicted that the response evoked by H100 will reflect excitation  
289 evoked by one or more components of the mixture that is tempered by inhibition evoked  
290 by one or more other components, and that pharmacologically blocking PI3K will result  
291 in an increase in the net response magnitude in instances where PI3K-based inhibitory  
292 signaling occurs. All cells were also tested with a higher concentration of H100 than the  
293 test concentration (Fig 1A, 3<sup>rd</sup> column). Only those cells showing a 10% or greater  
294 response to the higher concentration of H100, indicating their response was not  
295 saturated at the test concentration, were subsequently analyzed. The responsiveness  
296 of all the ORNs to an IBMX/ forskolin mixture (Fig 1A, 4<sup>th</sup> column) confirmed the  
297 functional integrity of the isolated ORNs.

298 Our data confirmed the results of previous studies suggesting that ORNs of  
299 *cGnao1*<sup>-/-</sup> mice maintain their odor responsiveness (Chamero et al., 2011; Oboti et al.,  
300 2014). H100 (1:100,000 dilution) evoked a mean response amplitude from ORNs  
301 isolated from *cGnao1*<sup>-/-</sup> mice of  $0.25 \pm 0.03$  (n = 79 ORNs from 4 mice) (Fig. 1C, 1<sup>st</sup> bar).  
302 The mean response amplitude of the ORNs from *cGnao1*<sup>-/-</sup> mice was significantly larger  
303 than that observed in the ORNs from WT mice ( $0.18 \pm 0.02$ , n = 78 ORNs from 5 mice)  
304 (Fig. 1C, 2<sup>nd</sup> bar) (P = 0.04, 1<sup>st</sup> bar vs 2<sup>nd</sup> bar), consistent with the inhibitory PI3K  
305 signaling pathway not being activated in ORNs from *cGnao1*<sup>-/-</sup> mice.

306 On incubating the ORNs from both the *cGnao1*<sup>-/-</sup> and B6 mice with the PI3K  
307 blocker LY294002 (10  $\mu$ M) prior to treatment with H100, no enhancement of the  
308 response was observed in the ORNs from *cGnao1*<sup>-/-</sup> mice, evoking a normalized mean  
309 response amplitude of  $0.24 \pm 0.03$  (n = 79 ORNs from 4 mice) (Fig 1C, 3<sup>rd</sup> bar) (P =  
310 0.07, 3<sup>rd</sup> bar vs 1<sup>st</sup> bar). The lack of change from baseline recordings would be  
311 consistent with the inhibitory PI3K signaling pathway not being activated in ORNs from  
312 *cGnao1*<sup>-/-</sup> mice. In contrast, the response of 39 of 78 (50%) ORNs from WT mice was  
313 significantly enhanced by PI3K blockade, evoking a normalized mean response  
314 amplitude of  $0.39 \pm 0.04$  (n = 78 ORNs from 5 mice) (Fig 1C, 4<sup>th</sup> bar) (P = 0.<001, 4<sup>th</sup>  
315 bar vs 2<sup>nd</sup> bar). The significantly smaller mean response of the ORNs from *cGnao1*<sup>-/-</sup>  
316 mice (P = 0.002, 3<sup>rd</sup> bar vs 4<sup>th</sup> bar) than that observed in the ORNs from WT mice would  
317 be consistent with the inhibitory PI3K signaling pathway not being activated in ORNs  
318 from *cGnao1*<sup>-/-</sup> mice. Presumably odor stimulation should not have activated PI3K  
319 signaling in either group of cells treated with LY294002. Thus, finding that blockade of  
320 PI3K in WT ORNs resulted in a normalized mean response that was significantly larger

321 than that of ORNs from the *cGnao1*<sup>-/-</sup> mice (Fig. 1C, 4<sup>th</sup> bar vs 3<sup>rd</sup> bar) could potentially  
322 indicate Gα<sub>o</sub>-independent activation of PI3K. However, that is not likely since blockade  
323 of PI3K had no effect on the response of ORNs from the *cGnao1*<sup>-/-</sup> mice (Fig. 1C, 3<sup>rd</sup> vs  
324 1<sup>st</sup> bars), suggesting the magnitude of the response in WT ORNs post-blockade reflects  
325 the dynamics of action of the drug when PI3K is activated. Collectively, these findings  
326 are consistent with the hypothesis that Gα<sub>o</sub> is functionally upstream of PI3K in the  
327 context of inhibitory transduction in mature ORNs.

328

### 329 **Gα<sub>o</sub> expression in the OE in mice carrying an OMP-Cre based deletion of Gnao1**

330 The loss of PI3K-based inhibition of excitatory signaling in odorant sensitive  
331 ORNs in the *cGnao1*<sup>-/-</sup> mice implies that Gα<sub>o</sub> localizes to the olfactory cilia where  
332 transduction occurs and that it is reduced in the *cGnao1*<sup>-/-</sup> mice. A previous study  
333 validated reduced *Gnao1* gene expression in the *cGnao1*<sup>-/-</sup> mice, but did not find  
334 reduced *Gnao1* gene expression the total OE (Chamero et al., 2011). Here we show  
335 deletion of exons 5 and 6 occurs in the OE at the genomic level using PCR with primers  
336 spanning this region (Fig 2A; Choi et al., 2016). The recombined *Gnao1* gene is  
337 present as a smaller fragment amplified from DNA isolated from the OE and VNO, but is  
338 at low to undetectable levels in the olfactory bulb where there is no OMP expression.  
339 Recombination is absent in B6 mice. *In situ* hybridization targets *Gnao1* expression to  
340 the mature ORN (OMP-expressing) layer of the OE (Fig 2B; Heron et al., 2013; Saraiva  
341 et al., 2015; Choi et al., 2016). Since *Gnao1* mRNA is abundant in ORNs (Heron et al.,  
342 2013; Omura and Mombaerts, 2014; Saraiva et al., 2015; Wang et al., 2017), at least  
343 some of the recombination potentially could be ascribed to mature ORNs. Immuno-

344 labeling cryosections of the OE localized expression of the  $G\alpha_o$  protein to the axon  
345 bundles mature (OMP-expressing) ORNs but was unable to localize expression of the  
346  $G\alpha_o$  protein to the distal compartments and/or cilia (data not shown).

347 We instead determined whether ectopically expressed  $G\alpha_o$  can be trafficked to  
348 the cilia (McEwen et al., 2008; McIntyre et al., 2015). Mice were intra-nasally injected  
349 with adeno-associated virus carrying fluorescently tagged  $G\alpha_o$  (Hynes et al., 2004)  
350 (AAV  $G\alpha_o$ :mcherry). *En face* imaging revealed  $G\alpha_o$ :mCherry in the cilia of transduced  
351 ORNs (Fig 3A). In ORNs transduced with adenovirus carrying  $G\alpha_o$ :GFP, GFP  
352 expression co-localized with the ciliary protein Arl13b (Fig. 3C), indicating that these  
353 results are not dependent on the identity of the fluorescent tag inserted into  $G\alpha_o$  or on  
354 the viral vector used for infection. Given that the OE is composed of multiple types of  
355 chemosensory cells (e.g., Munger, 2009), we then asked whether  $G\alpha_o$  could localize to  
356 the cilia of ORNs expressing ORs known to couple to  $G\alpha_{olf}$ . Using mice expressing  
357 tauGFP under the control of the SR1 OR gene, we found AAV expressed  $G\alpha_o$ :mCherry  
358 localized GFP<sup>+</sup> to the cilia (Fig. 3B), suggesting it is not excluded from canonical ORNs  
359

360  **$G\alpha_o$  enhances odorant-evoked coupling of a mammalian OR isolated from native**  
361 **ORNs responsive to an identified opponent odorant pair in HEK293T cells**

362 PI3K dependent inhibitory signaling has been demonstrated in both rats and  
363 mice (e.g., Brunert et al., 2010; Ukhanov et al., 2010). Several opponent  
364 (excitatory/inhibitory) odorant pairs have been identified for rat ORNs (e.g., Ukhanov et  
365 al., 2010; 2011), and here use one of those pairs to assess whether a single



366 mammalian OR can activate both PI3K signaling through  $G\alpha_o$  and ACIII signaling  
367 through  $G\alpha_{olf}$ .

368 We first measured the calcium signal in acutely dissociated rat ORNs evoked by  
369 octanol (OOL, 50  $\mu$ M) both alone and in combination with citral (CIT, 100  $\mu$ M). In a  
370 subset of OOL-responsive cells, co-application of CIT reduced the peak  $Ca^{2+}$  response  
371 by 5-fold on average (Fig, 4A). Pre-incubation of the cells with the PI3K $\beta$  and - $\gamma$  isoform  
372 specific blockers TGX221 and AS252424 (200 nM each) rescued the  $Ca^{2+}$  response  
373 (Fig, 4A), indicating that the antagonism was not the result of direct competition of the  
374 odorants for the binding site, but rather activation of the opponent inhibitory PI3K  
375 signaling pathway. Individual ORNs with this response profile were collected (Fig, 4B)  
376 for single cell RT-PCR using degenerate primers based on conserved regions of  
377 mammalian OR sequences (Touhara et al., 1999). Prior to OR amplification, the  
378 samples were tested for olfactory marker protein (OMP) expression to ensure that they  
379 were mature ORNs (Barber et al., 2000) and with  $\beta$ -actin primers to avoid testing those  
380 with detectable genomic DNA contamination (Chan et al., 1997). From a total of ten  
381 functionally delimited rat ORNs that met these requirements, we recovered three rat  
382 ORs (Olr1845, two ORNs; Olr1479, two ORNs; Olr1231, one ORN; no OR amplified,  
383 five ORNs) and cloned the full length sequences for heterologous expression under the  
384 control of a CMV promoter with Lucy and Rho tags to enhance their surface expression  
385 (Shepard et al., 2013).

386 We then tested the function of the receptors in a pCRE-SEAP assay by co-  
387 expressing them with  $G\alpha_{olf}$ , RTP1s and Ric8b in HEK293T cells along with a cAMP  
388 reporter gene (Durocher et al., 2000; Zhuang and Matsunami, 2007). The cAMP

389 reporter plasmid pCRE-SEAP expresses secreted alkaline phosphatase (SEAP) in  
390 response to cAMP binding to cAMP response elements (CRE). Odorants were added at  
391 48 hours post transfection and SEAP activity was measured 20 hours later. All results  
392 represent at least three independent replicate experiments. We focused on Olf1845,  
393 which responded consistently to OOL in a dose-dependent manner (Fig 5A). The other  
394 receptors did not respond consistently and will require further optimization to determine  
395 whether they show similar ligand profiles. Olf1845 did not produce measurable  
396 responses to other single odorants tested (250  $\mu$ M) including vanillin, eugenol, and  
397 isovaleric acid (data not shown). Olf1845 did not respond to 75  $\mu$ M CIT alone, but 75  
398  $\mu$ M CIT suppressed the response to OOL in a graded manner (Fig 5B). Control  
399 experiments in which cells were transfected with all of the signaling co-factors, except,  
400 Olf1845, and tested in parallel did not show changes in SEAP activity when stimulated  
401 with OOL alone or in combination with CIT (Fig. 5B, inset). We then tested the mouse  
402 OR OR261-1 (Olf447), known to respond to OOL (Saito et al., 2009), and confirmed its  
403 response to OOL in a dose-dependent manner (Fig 5C). In contrast to Olf1845,  
404 OR261-1 responded to 75  $\mu$ M CIT alone (Fig 5D), which was not affected by increasing  
405 concentrations of OOL. This result indicates that not all receptors that respond to OOL  
406 respond to CIT, or a mix of CIT and OOL, in the same manner. The experimental  
407 results with Olf1845 also serve as a positive control, allowing us to assign the effects  
408 seen with Olf1845 to that receptor and not one inherent in the heterologous cell.

409 To determine whether  $G\alpha_o$  enhances the odorant-evoked coupling of Olf1845 to  
410 PI3K, we used an ELISA specific for PIP3, the primary product of PI3K activation *in vivo*  
411 (Ukhanov et al., 2010). We first co-expressed Olf1845 with RTP1s in HEK293T cells,

412 relying on the endogenous G proteins and associated chaperones. At 48 hours post-  
413 transfection, a 30 sec treatment of the cells with CIT or OOL (500  $\mu$ M), increased the  
414 level of PIP3 by  $49.52 \pm 3.71$  pmol and  $25.78 \pm 7.02$  pmol, respectively, (n = at least 3  
415 independent replicates) above that in response to carrier (DMSO) treatment alone. This  
416 indicates that Orl1845 can activate the PI3K pathway in the heterologous system and  
417 that CIT is a stronger PIP3-dependent agonist. The response to CIT is significantly  
418 higher than that to OOL (Fig. 6, 1<sup>st</sup> pair of bars, P=0.04).

419 We then independently co-expressed three different G $\alpha$  subunits together with  
420 Orl1845, each with at least three independent replicates. G $\alpha_o$  overexpression  
421 significantly enhanced the increase in PI3K activation in response to CIT, resulting in a  
422 PIP3 level of  $64.16 \pm 1.44$  pmol (Fig. 6, 1<sup>st</sup> bars in the 1<sup>st</sup> and 2<sup>nd</sup> pair of bars, P= 0.02).  
423 This suggests that G $\alpha_o$  plays a role in mediating PI3K activation in the heterologous  
424 system. Again, the response to CIT was significantly higher than that to OOL (Fig. 6,  
425 2<sup>nd</sup> pair of bars, P=0.001). To test whether the increase in PI3K signaling resulted from  
426 the functional activity of G $\alpha_o$ , we co-expressed a G $\alpha_o$  gene carrying a G203T mutation  
427 that is predicted to decrease the ability of the protein to turn over GDP and GTP (Slepek  
428 et al., 1993) and attenuate its ability to activate downstream signaling. Unlike native  
429 G $\alpha_o$ , the mutated G protein subunit resulted in a lower level of PI3K activation by CIT  
430 ( $10.54 \pm 3.46$  pmol) in comparison to cells expressing only endogenous G proteins,  
431 actually significantly decreasing it, and no change in the level of PI3K activation by OOL  
432 ( $25.29 \pm 7.62$  pmol), indicating that the activity of G $\alpha_o$  is required for this process (Fig. 6,  
433 3<sup>rd</sup> pair of bars vs 1<sup>st</sup> pair of bars, P = 0.002; 0.97, respectively). G $\alpha_{off}$  co-expression,  
434 which enhances the cAMP response of ORs (Zhuang and Matsunami, 2007), also

435 resulted in lower levels of PI3K activation by both CIT and OOL ( $21.60 \pm 4.17$  pmol and  
436  $3.75 \pm 1.24$  pmol, respectively) in comparison to cells expressing only endogenous G  
437 proteins, actually significantly decreasing them (Fig. 6, 4<sup>th</sup> pair of bars vs 1<sup>st</sup> pair of bars,  
438  $P = 0.007$ ;  $0.04$ , respectively). This latter effect potentially reflects sequestration of the  
439 necessary G $\beta\gamma$  subunits from endogenous G proteins (Hippe et al., 2013).

440

## 441 **Discussion**

442 Our findings potentially associate a second G protein, G $\alpha_o$ , with inhibitory  
443 signalling in mammalian olfactory transduction by first showing that odor evoked  
444 phosphoinositide 3-kinase (PI3K)-dependent inhibition of signal transduction is absent  
445 in the native ORNs of mice carrying a conditional OMP-Cre based knockout of G $\alpha_o$ .  
446 Finding that conditional G $\alpha_o$  deletion eliminates odor evoked, PI3K-dependent inhibition  
447 in dissociated ORNs argues that G $\alpha_o$  is functionally upstream of PI3K. We then identify  
448 an OR from native rat ORNs that are activated by octanol through cyclic nucleotide  
449 signaling and inhibited by citral in a PI3K-dependent manner. We show that the OR  
450 activates cyclic nucleotide signaling and PI3K signaling in a manner that reflects its  
451 functionality in native ORNs. Collectively these findings raise the interesting possibility  
452 that a mammalian OR can interact with two different G proteins in a functionally  
453 identified, ligand-dependent manner.

454 We argue that functional data obtained in acutely dissociated ORNs implicate  
455 G $\alpha_o$  in mediating inhibitory olfactory signal transduction. Acutely dissociating ORNs  
456 destroys the normal polarity of the cells, exposing the entire cell to odors and allowing  
457 that G $\alpha_o$ -dependent activation of PI3K is not related to transduction per se. Two

458 findings counter this possibility. First, odorant sensitivity is predominately, if not entirely,  
459 localized to the cilia/dendritic knob in dissociated vertebrate (salamander) ORNs (Lowe  
460 and Gold, 1991) and the dissociated mammalian ORNs typically retain at least part of  
461 their ciliary complement in our hands. Second, the pharmacological effect of blocking  
462 PI3K-dependent inhibition seen here in the dissociated ORNs occurs with the same  
463 dynamics in ORNs in the intact OE where the normal polarity of the cells targets  
464 signaling to the cilia/dendritic knob, and where patch-clamping dendritic knobs shows  
465 that PI3K-dependent inhibition acts with msec resolution, setting the peak frequency  
466 and the latency of the train of action potentials evoked by an odor mixture (Ukhanov et  
467 al., 2010). Thus, we have no reason to assume the functional data are biased by using  
468 acutely dissociated ORNs. However, given we did not use littermate controls the  
469 possibility remains that the functional data reflect strain differences, which will require  
470 further experimentation to resolve.

471         Implicating  $G\alpha_o$  in the activation of PI3K is consistent with evidence that PI3K  
472 signaling is sensitive to pertussis toxin, which is indicative of  $G\alpha_{i/o}$ -dependency in other  
473 systems (e.g. Orr et al., 2002; Banquet et al., 2011; Hadi et al., 2013), as well as with  
474 evidence that  $G\alpha_o$  can signal through interactions of its associated  $\beta\gamma$  subunits with  
475 downstream effectors (Wettschureck, 2005; Steiner et al., 2006; Bondar and Lazar,  
476 2014). Published evidence shows that class 1B PI3K $\gamma$  is expressed in mouse ORNs,  
477 that PI3K $\gamma$ -deficient mice show almost a complete lack of odorant-induced PI3K activity  
478 in their OE, and that the ORNs of PI3K $\gamma$ -deficient mice show reduced sensitivity to PI3K  
479 mediated inhibition (Brunert et al., 2010). The  $\gamma$  catalytic subunit is thought to  
480 exclusively associate with the regulatory subunits that mediate binding to the  $G\beta\gamma$

481 subunit of heterotrimeric G proteins (e.g., Rameh and Cantley, 1999), which in our case  
482 would be  $G\alpha_o$  activated by the OR.

483  $G\alpha_o$  also mediates PLC signaling in mature ORNs (Schandar et al., 1998), as  
484 well as extracellular-signal-regulated kinase (ERK) signaling by a heterologously  
485 expressed OR (Bush et al., 2007) that is associated with cell survival and apoptosis.  
486 Since both the PLC and ERK pathways have been associated with PI3K-dependent  
487 signaling networks in other systems, temporally distinct waves of  $G\alpha_o$  activated PI3K  
488 (e.g., Jones et al., 1999; Goncharova et al., 2002) in ORNs could potentially mediate  
489 transduction as well as slower activation of cell survival and/or apoptotic pathways.  
490 There has been a published report for a  $G\alpha_o$ -mediated alternate, cyclic nucleotide-  
491 independent, PI3K-independent signaling pathway in mammalian ORNs that targets a  
492 downstream  $Cl^-$  conductance and presumably leads to an excitatory efflux of  $Cl^-$  (Scholz  
493 et al., 2016b). The functional significance of this pathway is unclear, but as the authors  
494 suggest, this pathway may be developmentally important since it appears to be  
495 associated with immature ORNs. Further work will be required to relate this finding to  
496 the  $G\alpha_o$ -mediated inhibitory signaling in mature ORNs proposed herein.

497 We show that excitation and PI3K-dependent inhibition can be mediated by the  
498 same OR when expressed heterologously, and that the antagonism is not the result of  
499 direct competition for a common binding site. As in the native ORNs from which the rat  
500 OR OI1845 was cloned, OOL acts as an excitatory ligand and CIT as an inhibitory  
501 ligand for OI1845 in a cAMP assay when heterologously expressed. This does not  
502 occur when the cells were transfected with the co-factors in the absence of the OR, nor  
503 when the cells were transfected with a different OR responsive to the same two ligands.

504 We also show that CIT is a stronger activator of PI3K than is OOL in a PIP3 assay when  
505 Olr1854 is heterologously expressed. Heterologous readouts of OR activation are  
506 slow in comparison to transduction, but similar assays reflect the ligand specificity of  
507 other ORs tested *in vivo* (Tsuboi et al., 2011), supporting our argument that Olr1845  
508 appears to be capable of directing the pattern of activation elicited by an opponent pair  
509 of ligands through two different signaling pathways. This finding for a mammalian OR is  
510 consistent with the ability of single insect olfactory receptors to similarly direct the  
511 pattern of activation of an ORN in studies using the ‘empty neuron’ approach (Hallem et  
512 al., 2004). Whether all ligands in the molecular receptive range of a given OR can  
513 activate PI3K, only to different extents, with the stronger PI3K-dependent agonists being  
514 the effective inhibitory ligands for the OR in question, as potentially suggested by Fig. 6,  
515 remains for future research. We focused on Olr1845, which allows that our finding  
516 could be idiosyncratic for Olr1845 or the OOL/CIT odorant pair, but evidence that  $G\alpha_o$   
517 can interact with other mouse ORs (Scholz et al., 2016b), as well as evidence that  
518 PI3K-dependent inhibition can be activated by a wide range of conventional odorants in  
519 native rat ORNs (Ukhanov et al., 2013), including other opponent odorant pairs  
520 (Ukhanov et al., 2011), argues for the generality of this finding across at least a subset  
521 of ORs.

522 Assuming the OR and  $G\alpha_o$  interact, the assumption would be they interact in the  
523 transduction (ciliary) compartment. As noted, both immature and mature ORNs express  
524  $G\alpha_o$  (Mayer et al., 2009; Keydar et al., 2013; Heron et al., 2013; Nickell et al., 2012;  
525 Omura and Mombaerts, 2014; Saraiva et al., 2015; Scholz et al., 2016a, Choi et  
526 al., 2016; Wang et al., 2017; Zhang et al., 2016). It remains to be determined, however,

527 whether the protein routinely localizes to the ciliary compartment, notwithstanding  
528 limited evidence for positive IHC staining for  $G\alpha_o$  in the distal compartments of  $OMP^+$   
529 ORNs in *Gnao1<sup>+/+</sup>* mice (Choi et al., 2016) and *Olfir73*-positive ORNs (Scholz et al.,  
530 2016a). The fact that we could show there appears to be no barrier excluding  $G\alpha_o$  from  
531 the ciliary compartment is consistent with ciliary expression since cilia are known to  
532 largely exclude non-resident proteins (McEwen et al., 2008; McIntyre et al., 2015),  
533 although this demonstration leaves open the question of constitutive expression of  $G\alpha_o$   
534 in the ciliary compartment. While  $G\alpha_o$  is expressed in sustentacular cells (SUSs)  
535 (unpublished observations), the possibility that it interacts with signaling in ORNs via  
536 ephaptic coupling (Su, et al., 2012) is not consistent with our physiological results  
537 obtained in acutely dissociated ORNs. Nor is it consistent with the absence of any  
538 evidence that mammalian ORNs and SUSs are grouped in stereotyped functional  
539 combinations that would be required to explain the observed ligand specificity.

540 GPCRs are increasingly appreciated to sequentially activate multiple G proteins  
541 such that the outcome of activation does not depend solely on the receptor identity but  
542 rather is influenced by extracellular factors such as the range of ligands present, as well  
543 as by intracellular factors including the abundance and localization of the G proteins  
544 present (e.g., Mashuo et al., 2015 and reviewed in Lohse and Hofmann, 2015;  
545 Latorraca et al., 2016). Such ‘functional selectivity’ (e.g., Luttrell, 2014; Smrcka, 2015)  
546 is a key characteristic of allosteric modulation in GPCRs (Christopoulos, 2014). Given  
547 that OR-ligand interaction is thought to be ‘fast and loose’ (Bhandawat, 2005) and  
548 growing evidence for loose allosteric coupling of the agonist binding site and the G  
549 protein coupling interface in GPCRs (e.g., Lohse and Hofmann, 2015; Manglik et al.,



550 2015; Wingler et al., 2019), a given OR could interact with both G protein isoforms  
551 without implying concurrent activation by a given odorant or the need for simultaneous  
552 coupling of the OR to both  $G\alpha_{olf}$  and  $G\alpha_o$ . Brief activation of the OR by a PI3K-  
553 dependent inhibitory ligand, for instance, could release pre-bound  $G\alpha_{olf}$  while resulting  
554 in a more favorable structure for binding to  $G\alpha_o$ . The fact that not all G proteins work *in*  
555 *vivo* by having the heterotrimers physically dissociate (e.g., Digby et al., 2006) could  
556 provide specificity for signals mediated by the  $\beta\gamma$  dimer, as in the present context, and  
557 avoid confound in the origin of the  $\beta\gamma$  dimer. However, the idea that ligand-bound  
558 GPCRs interact with and activate G proteins (e.g., Audet et al., 2012) is being replaced  
559 by emerging evidence that the GPCR and G protein are preassembled into protein  
560 complexes in which the G protein influences ligand affinity (e.g., DeVree et al., 2016;  
561 Venkatakrisnan et al., 2016). Thus, a subset of the OR expressed by a given cell  
562 could be primed for activation of  $G\alpha_o$ , and in turn PI3K inhibitory signaling.  
563 Understanding how functional selectivity in ORs could play out at the molecular level  
564 awaits further understanding of GPCR signaling in general.

565 In summary, our findings lay the groundwork to explore the interesting possibility  
566 that ORs can interact with two different G proteins in a functionally identified, ligand-  
567 dependent manner to mediate opponent signaling in mature mammalian ORNs. Going  
568 forward, the primary challenge will be to understand the expression pattern of  $G\alpha_o$ , and  
569 potentially other G proteins, in addition to  $G\alpha_{olf}$  in the transduction compartment. If  $G\alpha_o$   
570 is present in cilia, but perhaps at lower levels or not in all neurons, this may be better  
571 approached through genetic methods to label and visualize the endogenous protein.  
572 The possibility that ORs can interact with multiple G proteins in a functionally identified,

573 ligand-dependent manner in the context of transduction would be a paradigm-shift in our  
574 understanding of how the olfactory periphery sets the combinatorial pattern considered  
575 to be the basis of odor recognition and discrimination.

576

## 577 **Acknowledgements**

578 We thank Drs. Frank Zufall and Trese Leinders-Zufall (Saarland U., Homburg,  
579 Germany) for kindly providing the breeding stock for the *cGnao1*<sup>-/-</sup> mice, Dr. Sergei  
580 Zolotukhin (U. Florida) for assistance and guidance with adeno-associated virus  
581 infection, Dr. Hanns Hatt (Ruhr U., Bochum, Germany) for kindly providing the odorant  
582 mixture Henkel 100, and Leanne Adams (U. Florida) for technical assistance.

583

## 584 **Funding Sources**

585 This research was supported by the National Institute on Deafness and Other  
586 Communication Disorders through awards DC005995 and DC001655 to BWA,  
587 DC103555 to JCM and DC009606 to JRM.

588

## 589 **Author Contributions**

590 EAC, KU, YUB, JCM, and JRM designed the experiments. EAC, KU, YUB  
591 carried out the experiments and analyzed the data. EAC, BWA, and JCM prepared the  
592 manuscript. All authors discussed and contributed to writing the manuscript.

593

## 594 **Conflict of Interest**

595 The authors declare no competing financial interests.

596

## 597 **References**

598 Audet M et al. (2012) Restructuring G protein-coupled receptor activation. *Cell* 151:14–  
599 23.

600 Balla T, Szentpetery Z, Kim YJ (2009) Phosphoinositide signaling: new tools and  
601 insights. *Physiology (Bethesda)* 24:231–244.

602 Banquet S, Delannoy E, Agouni A, Dessy C, Lacomme S, Hubert F, Richard V, Muller  
603 B, Leblais V (2011) Role of Gi/o-Src kinase-PI3K/Akt pathway and caveolin-1 in  $\beta$ 2-  
604 adrenoceptor coupling to endothelial NO synthase in mouse pulmonary artery. *Cell*  
605 *Signal* 23:1136–1143.

606 Barber RD, Jaworsky DE, Yau KW, Ronnett G V (2000) Isolation and in vitro  
607 differentiation of conditionally immortalized murine olfactory receptor neurons. *J*  
608 *Neurosci* 20:3695–3704.

609 Bell GA, Laing DG, Pahhuber H (1987) Odor mixture suppression: evidence for a  
610 peripheral mechanism in human and rat. *Brain Res.* 426:8-18.

611 Belluscio L, Gold GH, Nemes A, Axel R (1998) Mice deficient in Golf are anosmic.  
612 *Neuron* 20:69–8.

613 Bhandawat V (2005) Elementary response of olfactory receptor neurons to odorants.  
614 *Science (80- )* 308:1931–1934.

615 Bondar A, Lazar J (2014) Dissociated G GTP and G Protein subunits are the major  
616 activated form of heterotrimeric Gi/o proteins. *J Biol Chem* 289:1271–1281.

617 Brady JD, Rich ED, Martens JR, Karpen JW, Varnum MD, Brown RL (2006) Interplay  
618 between PIP3 and calmodulin regulation of olfactory cyclic nucleotide-gated  
619 channels. *Proc Natl Acad Sci U S A* 103:15635–15640.

620 Brunert D, Klasen K, Corey EA, Ache BW (2010) PI3Kgamma-dependent signaling in  
621 mouse olfactory receptor neurons. *Chem Senses* 35:301–308.

622 Buck L, Axel R (1991) A novel multigene family may encode odorant receptors: A  
623 molecular basis for odor recognition. *Cell* 65:175–187.

624 Bush CF, Jones S V, Lyle AN, Minneman KP, Ressler KJ, Hall RA (2007) Specificity of  
625 olfactory receptor interactions with other G protein-coupled receptors. *J Biol Chem*  
626 282:19042–19051.

627 Cain WS. (1974) Odor intensity – mixtures and masking. *B Psychonomics Soc* 4:244-

- 628           244.
- 629 Chamero P, Katsoulidou V, Hendrix P, Bufe B, Roberts R, Matsunami H, Abramowitz J,  
630           Birnbaumer L, Zufall F, Leinders-Zufall T (2011) G protein G(alpha)o is essential for  
631           vomeronasal function and aggressive behavior in mice. *Proc Natl Acad Sci U S A*  
632           108:12898–12903.
- 633 Chan SL, Perrett CW, Morgan NG (1997) Differential expression of alpha 2-  
634           adrenoceptor subtypes in purified rat pancreatic islet A- and B-cells. *Cell Signal*  
635           9:71–78.
- 636 Choi J-M, Kim S-S, Choi C-I, Cha HL, Oh H-H, Ghil S, Lee Y-D, Birnbaumer L, Suh-Kim  
637           H (2016) Development of the main olfactory system and main olfactory epithelium-  
638           dependent male mating behavior are altered in G<sub>o</sub>-deficient mice. *Proc Natl Acad*  
639           *Sci* 113:10974–10979.
- 640 Christopoulos A (2014) Advances in G protein-coupled receptor allostery: from function  
641           to structure. *Mol Pharmacol* 86:463-78.
- 642 DeVree BT, Mahoney JP, Vélez-Ruiz GA, Rasmussen SGF, Kuzak AJ, Edwald E,  
643           Fung J-J, Manglik A, Masureel M, Du Y, Matt RA, Pardon E, Steyaert J, Kobilka  
644           BK, Sunahara RK (2016) Allosteric coupling from G protein to the agonist-binding  
645           pocket in GPCRs. *Nature* 535:182–186.
- 646 Digby GJ, Lober RM, Sethi PR, Lambert NA (2006) Some G protein heteromers  
647           physically dissociate in living cells. *Proc Natl Acad Sci* 103:17789-17794.
- 648 Durocher Y, Perret S, Thibaudeau E, Gaumont MH, Kamen A, Stocco R, Abramovitz M  
649           (2000) A reporter gene assay for high-throughput screening of G-protein-coupled  
650           receptors stably or transiently expressed in HEK293 EBNA cells grown in  
651           suspension culture. *Anal Biochem* 284:316–326.
- 652 Firestein, S, Shepherd, G (1992) Neurotransmitter antagonists block some odor  
653           responses in olfactory receptor neurons. *Neuroreport* 3:661-664.
- 654 Goncharova EA, Ammit AJ, Irani C, Carroll RG, Eszterhas AJ, Panettieri RA,  
655           Krymskaya VP (2002) PI3K is required for proliferation and migration of human  
656           pulmonary vascular smooth muscle cells. *Am J Physiol Lung Cell Mol Physiol*  
657           283:L354–L363.
- 658 Hadi T, Barrichon M, Mourtialon P, Wendremaire M, Garrido C, Sagot P, Bardou M,  
659           Lirussi F (2013) Biphasic Erk1/2 activation sequentially involving Gs and Gi  
660           signaling is required in beta3-adrenergic receptor-induced primary smooth muscle  
661           cell proliferation. *Biochim Biophys Acta - Mol Cell Res* 1833:1041–1051.

- 662 Hallem EA, Ho MG, Carlson JR (2004) The molecular basis of odor coding in the  
663 *Drosophila* antenna. *Cell* 117: 965-979.
- 664 Heron PM, Stromberg AJ, Breheny P, McClintock TS (2013) Molecular events in the cell  
665 types of the olfactory epithelium during adult neurogenesis. *Mol Brain* 6:49.
- 666 Hynes TR, Hughes TE, Berlot CH (2004) Cellular localization of GFP-tagged alpha  
667 subunits. *Meth Mol Biol* 237:233-46.
- 668 Ishii T, Omura M, Mombaerts P (2004) Protocols for two- and three-color fluorescent  
669 RNA in situ hybridization of the main and accessory olfactory epithelia in mouse. *J*  
670 *Neurocytol* 33:657–669.
- 671 Jiang M, Gold MS, Boulay G, Spicher K, Peyton M, Brabet P, Srinivasan Y, Rudolph U,  
672 Ellison G, Birnbaumer L (1998) Multiple neurological abnormalities in mice deficient  
673 in the G protein Go. *Proc Natl Acad Sci U S A* 95:3269–3274.
- 674 Jones SM, Klinghoffer R, Prestwich GD, Toker A, Kazlauskas A (1999) PDGF induces  
675 an early and a late wave of PI 3-kinase activity, and only the late wave is required  
676 for progression through G1. *Curr Biol* 9:512–521.
- 677 Keydar I, Ben-Asher E, Feldmesser E, Nativ N, Oshimoto A, Restrepo D, Matsunami H,  
678 Chien M-S, Pinto JM, Gilad Y, Olender T, Lancet D (2013) General olfactory  
679 sensitivity database (GOSdb): candidate genes and their genomic variations. *Hum*  
680 *Mutat* 34:32–41.
- 681 Kim SY, Mammen A, Yoo S-J, Cho B, Kim E-K, Park J-I, Moon C, Ronnett G V (2015a)  
682 Phosphoinositide and Erk signaling pathways mediate activity-driven rodent  
683 olfactory sensory neuronal survival and stress mitigation. *J Neurochem* 134:486–  
684 498.
- 685 Kim SY, Yoo S-J, Ronnett G V, Kim E-K, Moon C (2015b) Odorant stimulation promotes  
686 survival of rodent olfactory receptor neurons via PI3K/Akt activation and Bcl-2  
687 expression. *Mol Cells* 38:535–539.
- 688 Kurahashi T, Lowe, G, Gold, GH. (1994) Suppression of odorant responses by odorants  
689 in olfactory receptor cells. *Science* 265:118-120.
- 690 Laing DG, Panhuber H, Wilcox ME, Pittmann EA (1984) Quality and intensity of binary  
691 odor mixtures. *Physiol. Behav.* 33:309-319.
- 692 Laing DG, Wilcox ME (1987) An investigation of the mechanism of odor suppression  
693 using physical and dichorhnic mixtures. *Behav. Brain Res.* 26:79-87.
- 694 Latorraca NR, Venkatakrishnan AJ, Dror RO (2016) GPCR dynamics: Structures in  
695 motion. *Chem Rev:acs.chemrev.6b00177*.

- 696 Lohse MJ, Hofmann KP (2015) Spatial and temporal aspects of signaling by G protein–  
697 coupled receptors. *Mol Pharmacol* 88.
- 698 Lowe G, Gold GH (1991) The spatial distribution of odorant sensitivity and odor-induced  
699 currents in salamander olfactory receptor cells. *J Gen Physiol* 442:147-68.
- 700 Luttrell LM (2014) Minireview: More than just a hammer: ligand “bias” and  
701 pharmaceutical discovery. *Mol Endocrinol* 28:281–294.
- 702 Manglik A, Kim TH, Masureel M, Altenbach C, Yang Z, Hilger D, Lerch MT, Kobilka TS,  
703 Thian FS, Hubbell WL, Prosser RS, Kobilka BK (2015) Structural insights into the  
704 dynamic process of  $\beta$ 2-adrenergic receptor signaling. *Cell* 161:1101-1111.
- 705 Mashuo I, Ostrovskaya O, Kramer GM, Jones CD, Xie K, Martemyanov KA (2015)  
706 Distinct profiles of functional discrimination among G proteins determine the actions  
707 of G protein-coupled receptors. *Science Signaling* 8:1-16.
- 708 Mashukova A, Spehr M, Hatt H, Neuhaus EM (2006) Beta-arrestin2-mediated  
709 internalization of mammalian odorant receptors. *J Neurosci* 26:9902–9912.
- 710 Mayer U, Küller A, Daiber PC, Neudorf I, Warnken U, Schnölzer M, Frings S, Möhrlen F  
711 (2009) The proteome of rat olfactory sensory cilia. *Proteomics* 9:322–334.
- 712 McEwen DP, Jenkins PM, Martens JR (2008) Olfactory cilia: our direct neuronal  
713 connection to the external world. *Curr Top Dev Biol* 85:333–370.
- 714 McIntyre JC, Joiner AM, Zhang L, Iñiguez-Lluhí J, Martens JR (2015) SUMOylation  
715 regulates ciliary localization of olfactory signaling proteins. *J Cell Sci* 128:1934–  
716 1945.
- 717 Munger SD (2009) Olfaction: Noses within noses. *Nature* 459:521–522.
- 718 Nickell MD, Breheny P, Stromberg AJ, McClintock TS (2012) Genomics of mature and  
719 immature olfactory sensory neurons. *J Comp Neurol* 520:2608-2629.
- 720 Oboti L, Pérez-Gómez A, Keller M, Jacobi E, Birnbaumer L, Leinders-Zufall T, Zufall F,  
721 Chamero P (2014) A wide range of pheromone-stimulated sexual and reproductive  
722 behaviors in female mice depend on G protein G $\alpha$ . *BMC Biol* 12:31.
- 723 Oka Y, Omura M, Kataoka H, Touhara K (2004) Olfactory receptor antagonism between  
724 odorants. *Embo J* 23:120-126.
- 725 Omura M, Mombaerts, P (2014) Trpc2-expressing sensory neurons in the air olfactory  
726 epithelium. *Cell Reports* 8:583-595.
- 727 Orr AW, Pallero MA, Murphy-Ullrich JE (2002) Thrombospondin stimulates focal  
728 adhesion disassembly through Gi- and phosphoinositide 3-kinase-dependent ERK

- 729 activation. J Biol Chem 277:20453–20460.
- 730 Rameh LE, Cantley LC (1999) The role of phosphoinositide 3-kinase lipid products in  
731 cell function. J. Biol Chem 274:8347-8350.
- 732 Reddy G, Zak J, Vergassola M, Murthy VN (2018) Antagonism in olfactory receptor  
733 neurons and its implications for the perception of odor mixtures. eLife  
734 2018:7:e34598. DOI: 10.7554/eLife.34958.
- 735 Rospars JP, Lansky P, Chaput M, Duchamp-Viret P (2008) Competitive and  
736 noncompetitive odorant interactions in the early neural coding of odor mixtures. J  
737 Neurosci 28:2659-66.
- 738 Sanz G (2005) Comparison of odorant specificity of two human olfactory receptors from  
739 different phylogenetic classes and evidence for antagonism. Chem Senses 30:69–  
740 80.
- 741 Saraiva LR, Ibera-Soria X, Kahn M, Omura M, Scialdone A, Mombaerts P, Marioni JC,  
742 Logan SW (2015) Hierarchical deconstruction of mouse olfactory sensory neurons:  
743 from whole mucosa to single-cell RNA-seq. Sci Reports 5:18178.
- 744 Schandar M, Laugwitz KL, Boekhoff I, Kroner C, Gudermann T, Schultz G, Breer H  
745 (1998) Odorants selectively activate distinct G protein subtypes in olfactory cilia. J  
746 Biol Chem 273:16669–16677.
- 747 Scholz P, Kalbe B, Jansen F, Altmueller J, Becker C, Mohrhardt J, Schreiner B,  
748 Gisselmann G, Hatt H, Osterloh S (2016a) Transcriptome analysis of murine  
749 olfactory sensory neurons during development using single cell RNA-Seq. Chem  
750 Senses 313-323.
- 751 Scholz P, Mohrhardt J, Jansen F, Kalbe B, Haering C, Klasen K, Hatt H, Osterloh S  
752 (2016b) Identification of a novel Gnao-mediated alternate olfactory signaling  
753 pathway in murine OSNs. Front Cell Neurosci 10:63.
- 754 Shepard BD, Natarajan N, Protzko RJ, Acres OW, Pluznick JL (2013) A cleavable N-  
755 terminal signal peptide promotes widespread olfactory receptor surface expression  
756 in HEK293T cells. PLoS One 8:e68758.
- 757 Shirokova E, Schmiedeberg K, Bedner P, Niessen H, Willecke K, Raguse J-D,  
758 Meyerhof W, Krautwurst D (2005) Identification of specific ligands for orphan  
759 olfactory receptors. G protein-dependent agonism and antagonism of odorants. J  
760 Biol Chem 280:11807–11815.
- 761 Slepak VZ, Wilkie TM, Simon MI (1993) Mutational analysis of G protein alpha subunit  
762 G(o) alpha expressed in *Escherichia coli*. J Biol Chem 268:1414–1423.

- 763 Smrcka A V. (2015) Fingerprinting G protein-coupled receptor signaling. *Sci Signal*  
764 8:fs20–fs20.
- 765 Spehr M, Wetzel CH, Hatt H, Ache BW (2002) 3-phosphoinositides modulate cyclic  
766 nucleotide signaling in olfactory receptor neurons. *Neuron* 33:731-739.
- 767 Steiner D, Saya D, Schallmach E, Simonds WF, Vogel Z (2006) Adenylyl cyclase type-  
768 VIII activity is regulated by G $\beta\gamma$  subunits. *Cell Signal* 18:62–68.
- 769 Su C-Y, Menuz K, Reisert J, Carlson JR (2012) Non-synaptic inhibition between  
770 grouped neurons in an olfactory circuit. *Nature* 492: 66-72.
- 771 Takeuchi H, Ishida H, Hikichi S, Kurahashi T (2009) Mechanism of olfactory masking in  
772 the sensory cilia. *J. Gen Physiol.* 133:583-601.
- 773 Touhara K, Sengoku S, Inaki K, Tsuboi A, Hirono J, Sato T, Sakano H, Haga T (1999)  
774 Functional identification and reconstitution of an odorant receptor in single olfactory  
775 neurons. *Proc Natl Acad Sci U S A* 96:4040–4045.
- 776 Tsuboi A, Imai T, Kato HK, Matsumoto H, Igarashi KM, Suzuki M, Mori K, Sakano H  
777 (2011) Two highly homologous mouse odorant receptors encoded by tandemly-  
778 linked MOR29A and MOR29B genes respond differently to phenyl ethers. *Eur J*  
779 *Neurosci* 33:205–213.
- 780 Ukhanov K, Brunert D, Corey EA, Ache BW (2011) Phosphoinositide 3-kinase-  
781 dependent antagonism in mammalian olfactory receptor neurons. *J Neurosci*  
782 31:273–280.
- 783 Ukhanov K, Corey EA, Ache BW (2013) Phosphoinositide 3-kinase dependent inhibition  
784 as a broad basis for opponent coding in mammalian olfactory receptor neurons.  
785 *PLoS One* 8:e61553.
- 786 Ukhanov K, Corey EA, Brunert D, Klasen K, Ache BW (2010) Inhibitory odorant  
787 signaling in mammalian olfactory receptor neurons. *J Neurophysiol* 103:1114–  
788 1122.
- 789 Venkatakrisnan AJ, Deupi X, Lebon G, Heydenreich FM, Flock T, Miljus T, Balaji S,  
790 Bouvier M, Veprintsev DB, Tate CG, Schertler GFX, Babu MM (2016) Diverse  
791 activation pathways in class A GPCRs converge near the G-protein-coupling  
792 region. *Nature* 536:484–487.
- 793 Wang Q, Titlow WB, McClintock DA, Stromberg AJ, McClintock TS (2017) Activity-  
794 dependent gene expression in the mammalian olfactory epithelium. *Chem Senses*  
795 42:611-624.
- 796 Watt WC, Sakano H, Lee Z-Y, Reusch JE, Trinh K, Storm DR (2004) Odorant



- 797 stimulation enhances survival of olfactory sensory neurons via MAPK and CREB.  
798 Neuron 41:955–967.
- 799 Wekesa KS, Anholt RR (1999) Differential expression of G proteins in the mouse  
800 olfactory system. Brain Res 837:117–126.
- 801 Wettschureck N (2005) Mammalian G proteins and their cell type specific functions.  
802 Physiol Rev 85:1159–1204.
- 803 Wingler LM, Elgeti M, Hilger D, Latorraca NR, Lerch MT, Stus DP, Dror RO, Koblika BK,  
804 Hubbell, WL, Lefkowitz RJ (2019) Angiotensin analogs with divergent bias stabilize  
805 distinct receptor conformations. Cell 176:468-478.
- 806 Xu L, Wenze L, Venkatakaushik V, Hillman EMC, Firestein S (2019) Widespread  
807 receptor driven modulation in peripheral olfactory coding. bioRxiv Sept 8, 2019:  
808 doi:<http://dx.doi.org/10.1101/760330>.
- 809 Yu Y, Boyer NP, Zhang C (2014) Three structurally similar odorants trigger distinct  
810 signaling pathways in a mouse olfactory neuron. Neuroscience 275:194–210.
- 811 Zhainazarov AB, Spehr M, Wetzel CH, Hatt H, Ache BW (2004) Modulation of the  
812 olfactory CNG channel by PtdIns(3,4,5)P<sub>3</sub>. J Memb Biol 201:51–57.
- 813 Zhang G, Ttilow WB, Biecker SM, Stromberg AJ, McClintock TS (2016) Lhx2  
814 determines odorant receptor expression frequency in mature olfactory sensory  
815 neurons, eNeuro 3(5) pii ENEURO 0230-16.2016.
- 816 Zhuang H, Matsunami H (2007) Synergism of accessory factors in functional expression  
817 of mammalian odorant receptors. J Biol Chem 282:15284–15293.
- 818 Zolotukhin S, Potter M, Zolotukhin I, Sakai Y, Loiler S, Fraites TJ, Chiodo VA,  
819 Phillipsberg T, Muzyczka N, Hauswirth WW, Flotte TR, Byrne BJ, Snyder RO  
820 (2002) Production and purification of serotype 1, 2, and 5 recombinant adeno-  
821 associated viral vectors. Methods 28:158–167.

822

## 823 Legends

824

### 825 **Figure 1. $G\alpha_o$ is required for PI3K-dependent inhibitory signal transduction in**

826 **mouse ORNs.** A. Representative odor-evoked calcium responses of 23 ORNs acutely

827 dissociated from the main olfactory organ of wild type (W) (left panel) and 23 ORNs

828 from knockout (K/O, *cGnao1*<sup>-/-</sup>) (right panel) mice, before (column 1) and after (column

829 2) incubation with the PI3K inhibitor LY294002 (LY). Stimulus: Henkel 100 (H100,  
830 1/100,000 dilution). Column 3, responses to a tenfold higher concentration of H100  
831 (1/10,000). Column 4, responses to a mixture of IBMX (50 $\mu$ M) and Forskolin (50 $\mu$ M).  
832 The fluorescence intensity traces were normalized to the maximum fluorescent intensity  
833 generated in response to IBMX/Forskolin, and then color coded from blue (minimum  
834 fluorescent intensity to yellow (maximum fluorescent intensity). Stimulus pulse duration  
835 was 5s for columns 1, 2, and 3, and 10s for column 4. B. Representative time/intensity  
836 plots of the calcium responses of W type ORN # 21 in A (top row) and K/O type ORN #  
837 6 in A (bottom row). C. Bar graph comparing the average amplitude of the odor-evoked  
838 calcium responses of 79 ORNs from K/O mice and 78 ORNs from W mice before and  
839 after incubation with LY. Statistical comparisons based on the Mann-Whitney Rank  
840 Sum Test.

841  
842 **Figure 2. OMP-Cre mediated *Gnao1* deletion in the olfactory epithelia of *cGnao1*<sup>-/-</sup>**  
843 **knockout mice.** A. Genomic DNA extracted from the OE, VNO, and OB was examined  
844 by PCR for recombination of floxed alleles. C57BL/6 WT (WT) mice were used for  
845 comparison. In the KO mice, both the WT and OMP-Cre (Cre) alleles are detected.  
846 The recombined *Gnao1* ( $\Delta$ *Gao*) allele is detected in the OE and VNO of the KO mice as  
847 indicated by the smaller fragment in the lower panel. B. Comparison of *Gnao1* (*Gao*)  
848 and OMP expression in the OE of B6 mice by *in situ* hybridization of cryosection from  
849 B6 mice. OMP expression is restricted to the mature ORNs.  
850

851 **Figure 3. Ectopically expressed  $G\alpha_o$  can enter the cilia of mammalian ORNs.** *En*  
852 *face* imaging of ORNs expressing  $G\alpha_o$  internally tagged with mCherry or GFP. A. Three  
853 examples of AAV infected ORNs ectopically expressing  $G\alpha_o$ :mCherry. B.  $G\alpha_o$ :mCherry  
854 can be co-localized to SR1-GFP+ ORNs. mCherry expression is found throughout  
855 infected ORNs including in the dendritic knobs and cilia. Scale bars represent 10  $\mu$ M.  
856 C. AV infected ORNs of C57BL/6 mice ectopically expressing  $G\alpha_o$ :GFP and  
857 Arl13b:mCherry.  $G\alpha_o$  expression overlaps with that of Arl13b indicating that ciliary  
858 localization of the ectopically expressed protein does not depend on the vector or tag.  
859

860 **Figure 4. Identification of ORNs responsive to the antagonistic odorant pair**  
861 **octanol and citral for single cell RT-PCR.** A. Fluo-3 calcium imaging of dissociated  
862 rat ORNs was used to identify single cells for RT-PCR. Representative recording of the  
863 somatic  $Ca^{2+}$  response from one of ten rat ORNs activated by octanol (OOL; 50  $\mu$ M) in  
864 which citral (CIT; 100  $\mu$ M) inhibited the response and pretreatment with PI3K inhibitors  
865 TGX221 and AS252424 (TGX/AS; 200 nM each) partially relieved the antagonism. B.  
866 Image of an ORN identified by calcium imaging prior to collection for single cell RT-  
867 PCR.

868  
869 **Figure 5.  $G\alpha_{olf}$  and ACIII activation by rat Olf1845 in response to octanol and**  
870 **citral.** A. Line graph showing that rat Olf1845 responds in a dose dependent manner to  
871 OOL in a pCRE-SEAP assay. Response to OOL is denoted by open circles. B. Bar  
872 graph showing that the cAMP response of rat Olf1845 to OOL at the concentrations  
873 indicated (dark bars) was reduced in a graded manner when the odorant was presented

874 in a binary mixture with CIT at the concentration indicated (light bars). Inset: Bar graph  
875 showing the response of cells not expressing an OR tested in the same experimental  
876 paradigm. C. Line graph showing that a different mouse OR (mOR261-1) also  
877 responds in a dose dependent manner to OOL in a pCRE-SEAP assay (open circles).  
878 D. Bar graph showing that in contrast to B, the cAMP response of mouse OR261-1 to  
879 OOL at the concentrations indicated. (dark bars) was actually enhanced, i.e., shows  
880 additivity, when the odorant was presented in binary mixture with CIT at the  
881 concentration indicated (light bars). Data are presented as SEAP activity (OD630)  $\pm$   
882 SEM representing at least three independent replicate experiments. Response of cells  
883 to DMSO has been subtracted in all cases.

884

885 **Figure 6. PI3K activation by rat Olr1845 in response to octanol and citral.** Bar  
886 graph showing the elevation of endogenous PIP3 in HEK293T cells transfected with  
887 rat Olr1845 in response to citral (CIT; 500  $\mu$ M) and octanol (OOL; 500  $\mu$ M). PI3K activity  
888 was measured by a PIP3 ELISA at 48 hours post-transfection in response to a 30 sec  
889 odorant exposure. The PIP3 level in DMSO-treated control cells is subtracted in all  
890 instances. The receptor was either expressed alone (endogeneous, 1<sup>st</sup> pair of bars),  
891 with  $G\alpha_o$  (2<sup>nd</sup> pair of bars), with  $G\alpha_{oG203T}$  (3<sup>rd</sup> pair of bars), or with  $G\alpha_{olf}$  (4<sup>th</sup> pair of bars)  
892 Data are presented as change in pmol PIP3  $\pm$  SEM, representing at least three  
893 independent replicates. Probabilities for the various comparisons listed in the text are  
894 indicated by the horizontal lines. Statistical comparison based on the Student's t test.

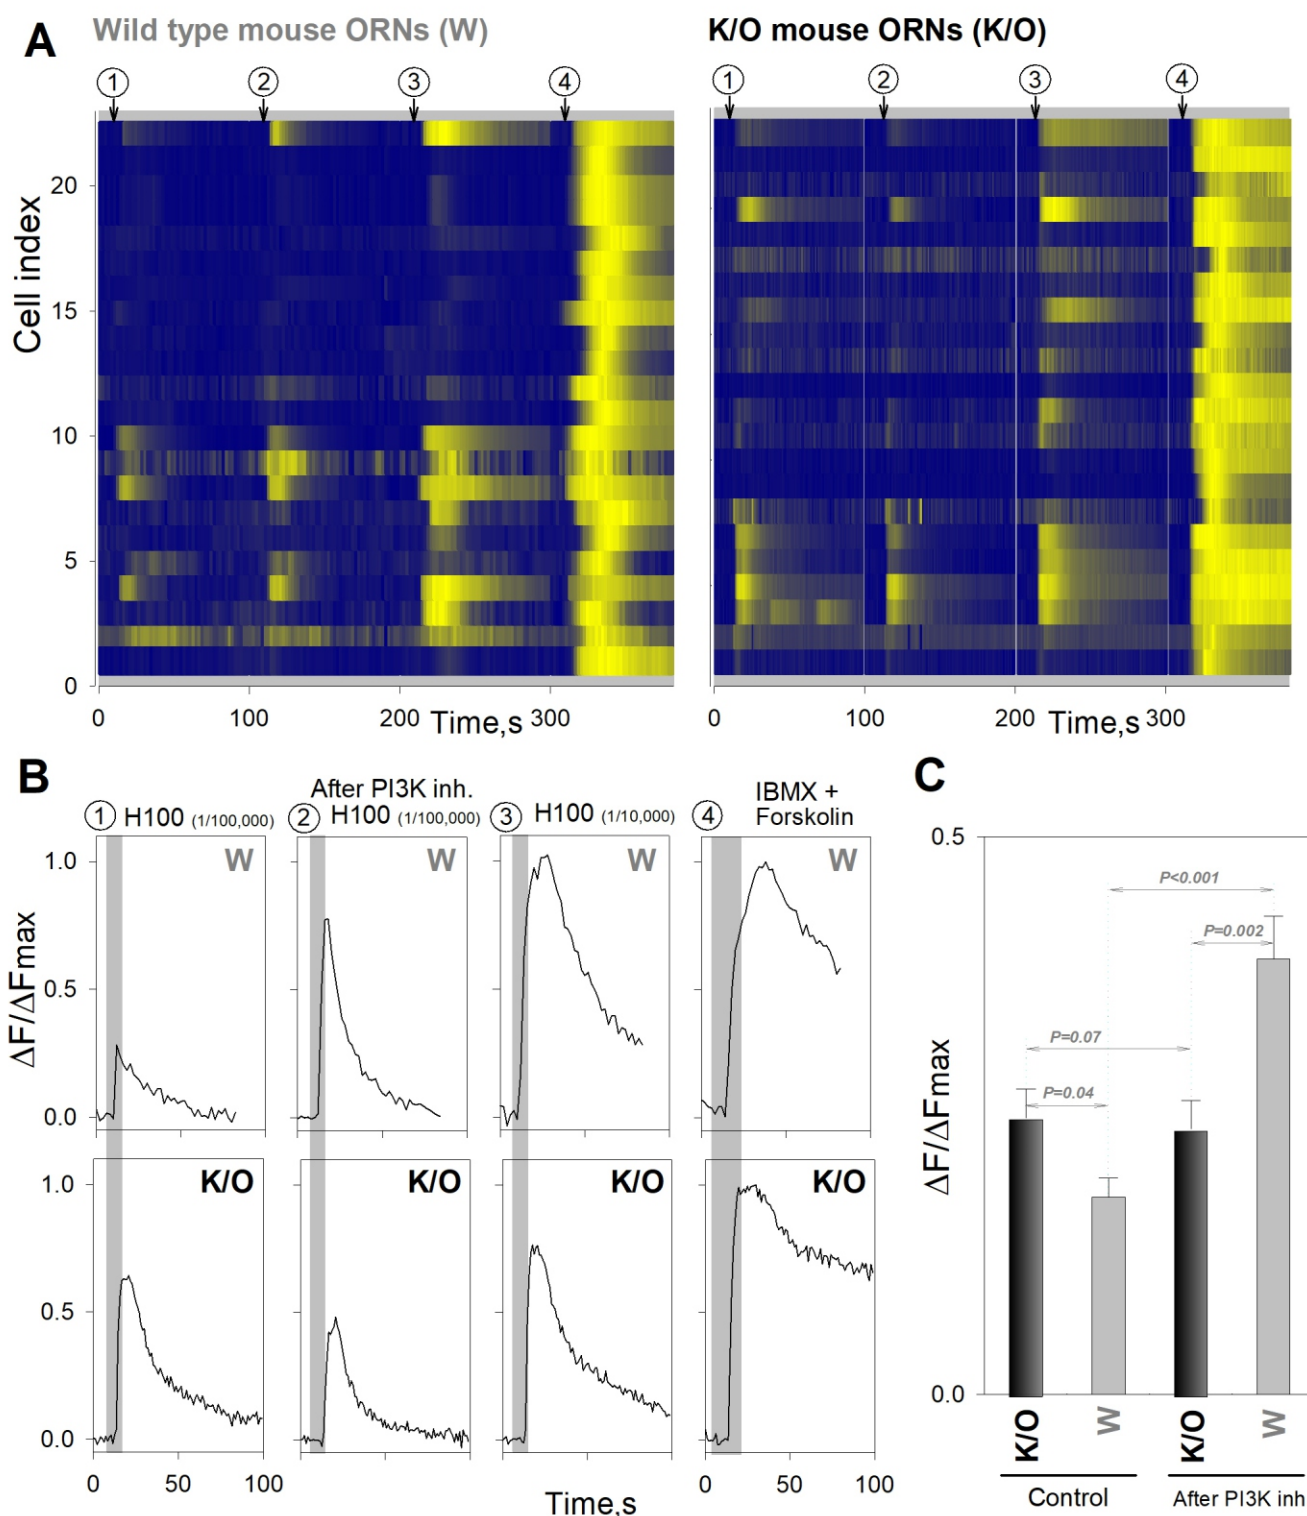

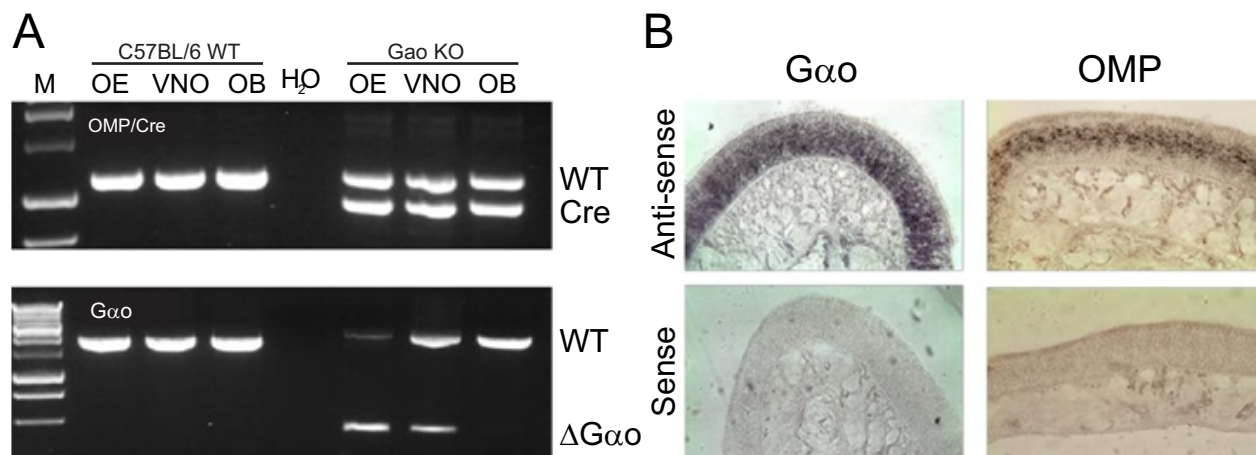

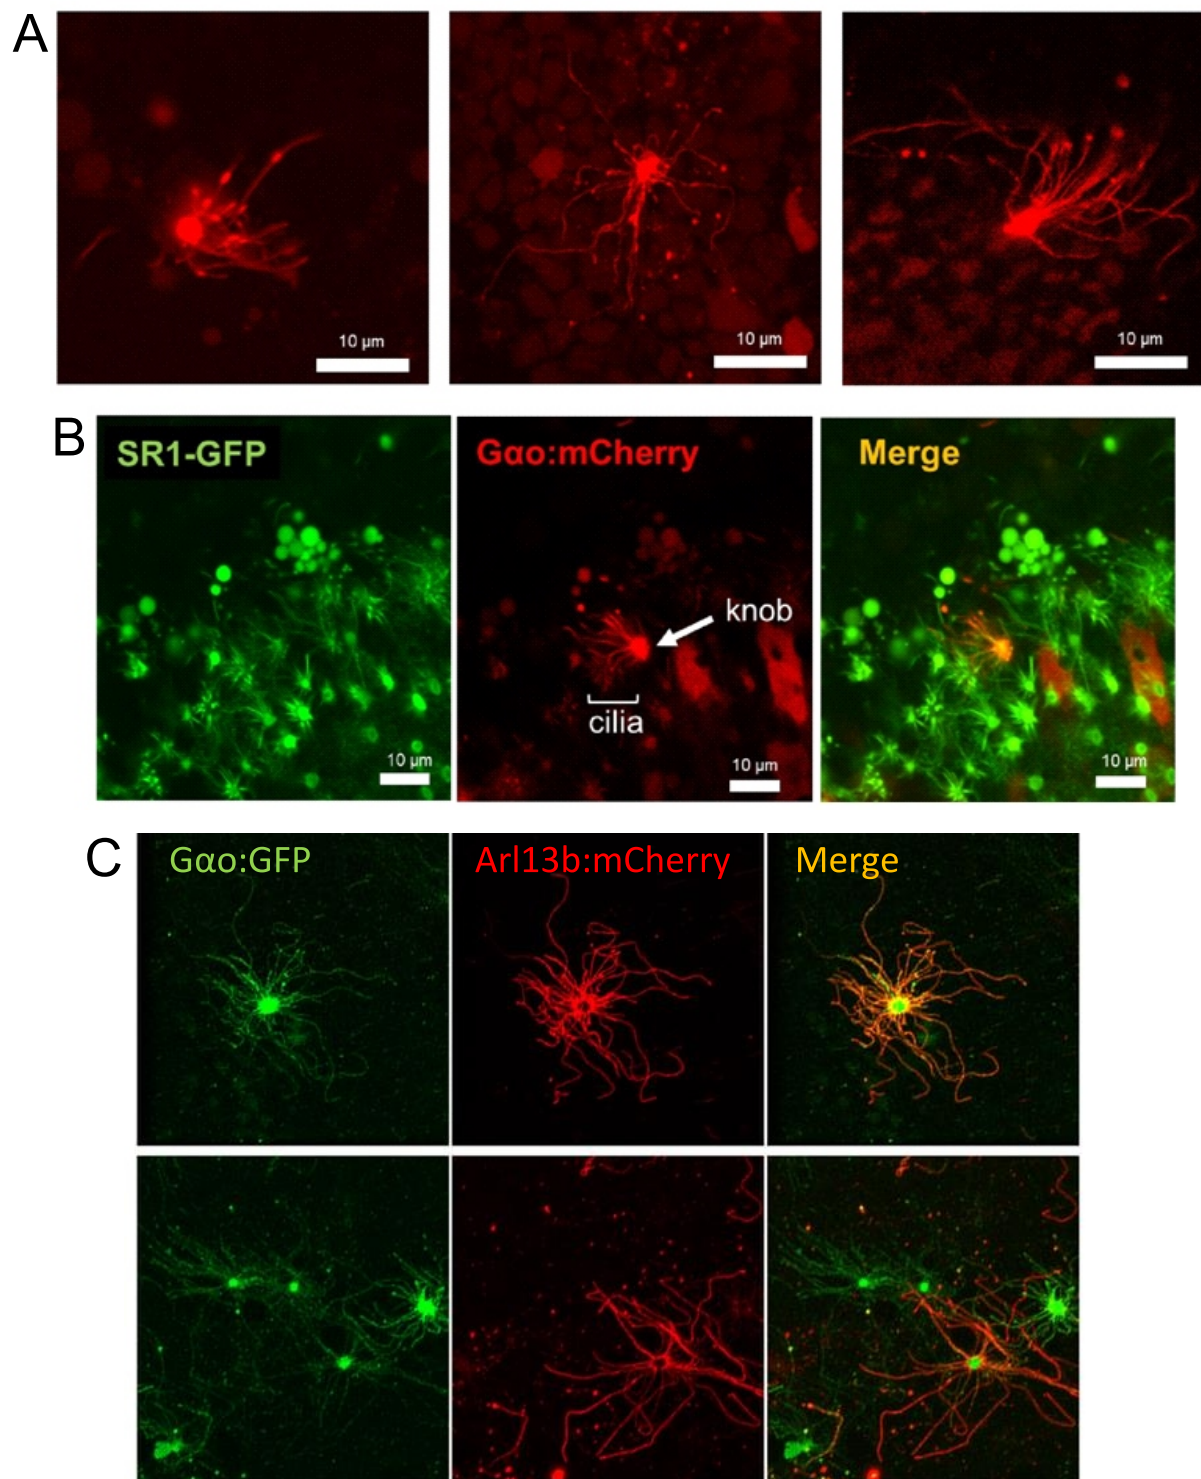

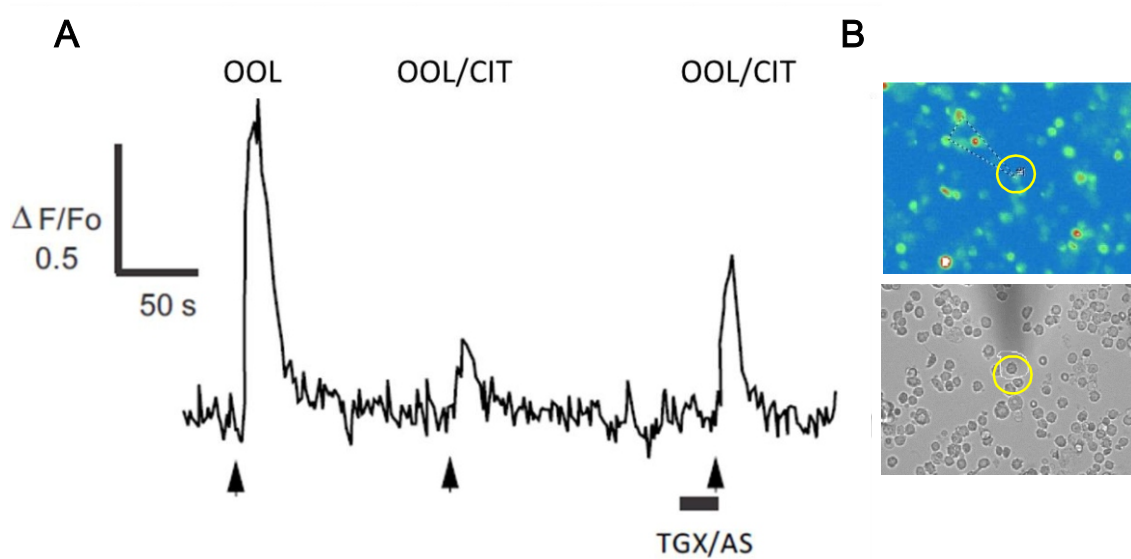



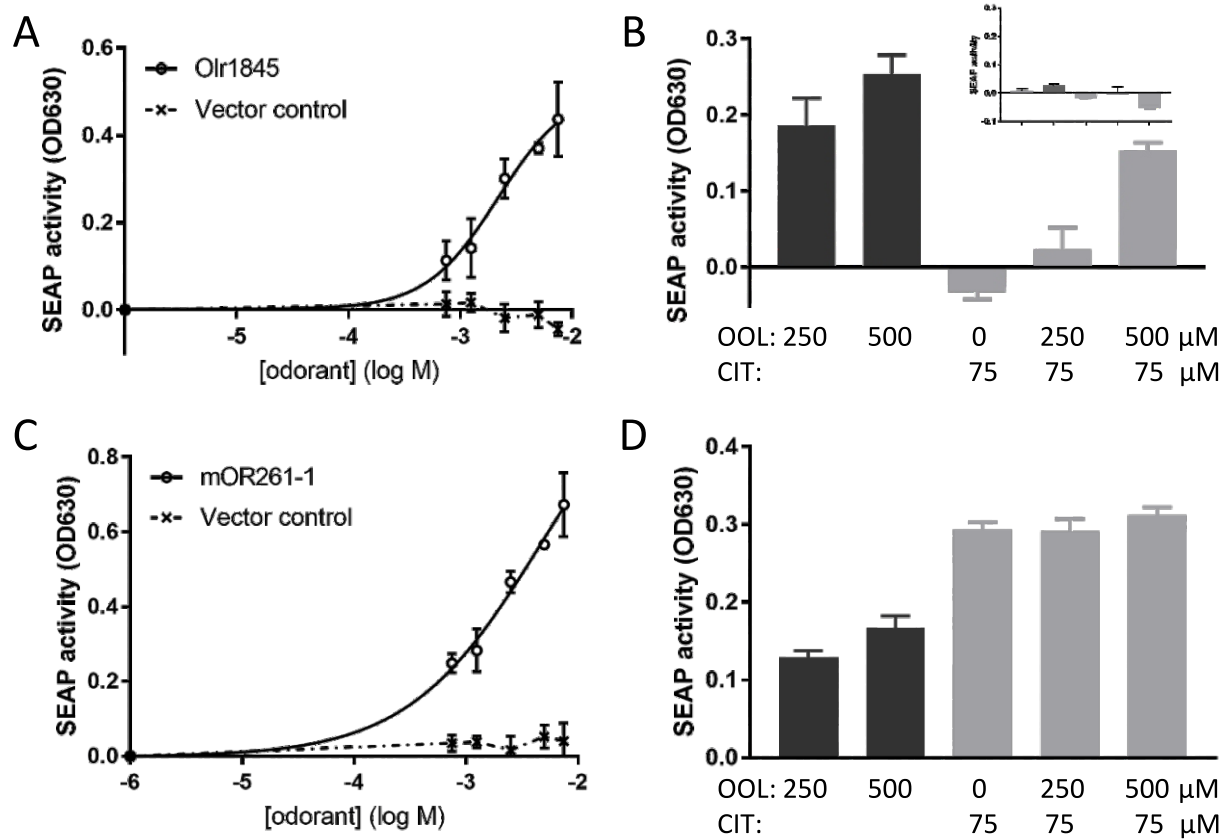

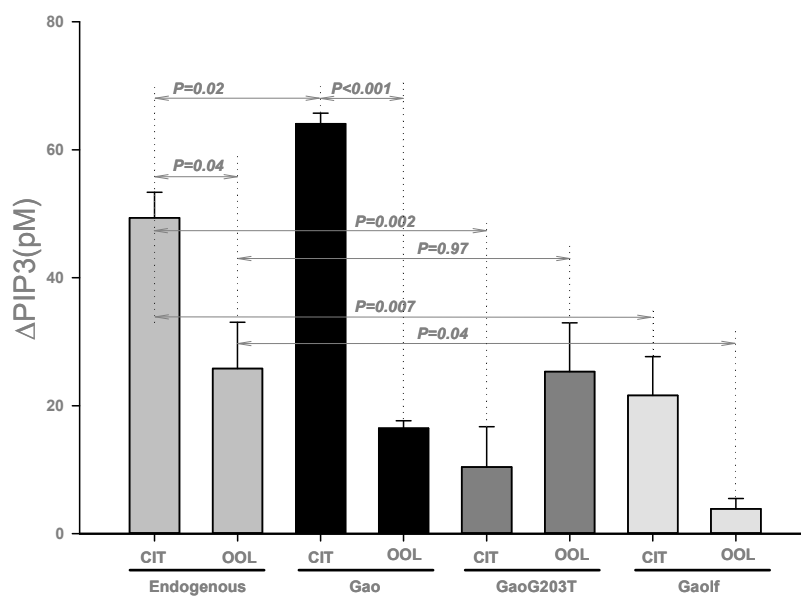

Source: http://biorxiv.org/content/10.1101/811125v1.full.pdf
